# Supplementary material
Source: MDPI journal article supplement (https://www.mdpi.com/2072-4292/14/1/70)
Supplement: s1 [file s1]

**Table S1.** The change of population density (2000, 2015, 2020) and built-up area (2000,2005, 2010) in the 10 mega-regions.

| <b>Pop<br/>Density (pop/km2)</b> | <b>2000</b> | <b>2015</b> | <b>2020</b> |
|----------------------------------|-------------|-------------|-------------|
| São Paulo                        | 385.89      | 456.93      | 485.59      |
| Jakarta                          | 901.72      | 1089.47     | 1168.26     |
| Mexico City                      | 152.69      | 192.08      | 211.66      |
| PRD                              | 1016.96     | 1469.52     | 1669.82     |
| Paris                            | 484.66      | 534.86      | 555.45      |
| Boston                           | 463.07      | 502.18      | 517.50      |
| Tokyo                            | 417.35      | 421.38      | 423.24      |
| Nile                             | 1216.57     | 1602.97     | 1782.85     |
| YRD                              | 646.59      | 800.98      | 867.88      |
| <b>BU(km2)</b>                   | <b>2000</b> | <b>2005</b> | <b>2010</b> |
| São Paulo                        | 6412.64     | 6555.60     | 6762.73     |
| Jakarta                          | 7715.62     | 8418.48     | 8730.55     |
| Mexico City                      | 7768.11     | 8430.33     | 8812.25     |
| PRD                              | 4864.82     | 4886.15     | 5765.37     |
| Paris                            | 2861.03     | 3008.45     | 3674.53     |
| Boston                           | 15274.09    | 16039.94    | 17545.08    |
| Tokyo                            | 22540.03    | 23101.47    | 23446.72    |
| Nile                             | 3841.95     | 4048.64     | 5050.15     |
| YRD                              | 10549.52    | 13624.9     | 16199.55    |

**Table S2.** The Pearson correlation of UDI/LST pair from 2003 to 2020.

| <b>Year</b> | <b>Jakarta</b> | <b>Boston</b> | <b>São Paulo</b> | <b>PRD</b> | <b>Nile</b> | <b>Tokyo</b> | <b>Mexico City</b> | <b>Paris</b> | <b>YRD</b> |
|-------------|----------------|---------------|------------------|------------|-------------|--------------|--------------------|--------------|------------|
| <b>2003</b> | 0.97*          | 0.95*         | 0.97*            | 0.99*      | 0.45        | 0.92*        | 0.91*              | 0.99*        | 0.84*      |
| <b>2004</b> | 0.97*          | 0.95*         | 0.97*            | 0.99*      | 0.50        | 0.92*        | 0.93*              | 0.99*        | 0.89*      |
| <b>2005</b> | 0.96*          | 0.95*         | 0.97*            | 0.99*      | 0.47        | 0.92*        | 0.90*              | 0.99*        | 0.96*      |
| <b>2006</b> | 0.97*          | 0.95*         | 0.98**           | 0.99*      | 0.50        | 0.92*        | 0.90*              | 0.99*        | 0.90*      |
| <b>2007</b> | 0.97*          | 0.96*         | 0.97*            | 0.99*      | 0.49        | 0.92*        | 0.91*              | 0.90*        | 0.94*      |
| <b>2008</b> | 0.97*          | 0.95*         | 0.97*            | 0.99*      | 0.51        | 0.92*        | 0.91*              | 0.99*        | 0.95*      |
| <b>2009</b> | 0.97*          | 0.95*         | 0.96*            | 0.99*      | 0.44        | 0.92*        | 0.90*              | 0.99*        | 0.94*      |
| <b>2010</b> | 0.95*          | 0.95*         | 0.96*            | 0.99*      | 0.44        | 0.91*        | 0.93*              | 0.99*        | 0.96*      |
| <b>2011</b> | 0.96*          | 0.95*         | 0.97*            | 0.98*      | 0.54        | 0.92*        | 0.90*              | 0.90*        | 0.97*      |
| <b>2012</b> | 0.97*          | 0.95*         | 0.96*            | 0.98*      | 0.48        | 0.92*        | 0.91*              | 0.90*        | 0.96*      |
| <b>2013</b> | 0.96*          | 0.95*         | 0.96*            | 0.97*      | 0.51        | 0.91*        | 0.92*              | 0.99*        | 0.97*      |
| <b>2014</b> | 0.96*          | 0.95*         | 0.96*            | 0.97*      | 0.56        | 0.91*        | 0.90*              | 0.99*        | 0.96*      |
| <b>2015</b> | 0.96*          | 0.95*         | 0.95*            | 0.95*      | 0.66        | 0.91*        | 0.91*              | 0.90*        | 0.96*      |
| <b>2016</b> | 0.89*          | 0.92**        | 0.91*            | 0.93*      | 0.80*       | 0.80*        | 0.88*              | 0.90*        | 0.95*      |
| <b>2017</b> | 0.94*          | 0.94*         | 0.95*            | 0.94       | 0.66        | 0.90*        | 0.91*              | 0.90*        | 0.97*      |
| <b>2018</b> | 0.94*          | 0.94*         | 0.95*            | 0.92*      | 0.63        | 0.88         | 0.93*              | 0.90*        | 0.95*      |
| <b>2019</b> | 0.94*          | 0.94*         | 0.94             | 0.95*      | 0.64        | 0.89         | 0.90*              | 0.90*        | 0.96*      |
| <b>2020</b> | 0.94*          | 0.94*         | 0.94             | 0.95*      | 0.63        | 0.89         | 0.90*              | 0.80*        | 0.95*      |

\* Correlation is significant at the 0.01 level.

**Table S3. The Pearson correlation of UDI/CHT pair from 2003 to 2020.**

| Year | Jakarta | Boston | São Paulo | PRD   | Nile  | Tokyo | Mexico City | Paris | YRD   |
|------|---------|--------|-----------|-------|-------|-------|-------------|-------|-------|
| 2003 | 0.99*   | 0.87*  | 0.98*     | 0.99* | 0.97* | 0.97* | 0.21        | 0.90* | 0.80* |
| 2004 | 0.96*   | 0.77*  | 0.98*     | 0.99* | 0.97* | 0.97* | 0.58        | 0.70  | 0.88* |
| 2005 | 0.92*   | 0.94*  | 0.97*     | 0.99* | 0.96* | 0.98* | -0.14       | 0.52  | 0.90* |
| 2006 | 0.98*   | 0.94*  | 0.98*     | 0.99* | 0.95* | 0.95* | -0.07       | 0.68* | 0.89* |
| 2007 | 0.96*   | 0.93*  | 0.99*     | 0.98* | 0.97* | 0.95* | -0.16       | 0.47  | 0.93* |
| 2008 | 0.97*   | 0.94*  | 0.98*     | 0.99* | 0.98* | 0.96* | 0.24        | 0.47  | 0.98* |
| 2009 | 0.98*   | 0.81*  | 0.98*     | 0.99* | 0.99* | 0.95* | -0.24       | 0.64  | 0.96* |
| 2010 | 0.96*   | 0.92*  | 0.99*     | 0.99* | 0.98* | 0.95* | -0.39       | 0.73  | 0.95* |
| 2011 | 0.98*   | 0.93*  | 0.98*     | 0.99* | 0.99* | 0.91* | -0.23       | 0.64  | 0.94* |
| 2012 | 0.98*   | 0.94*  | 0.98*     | 0.99* | 0.99* | 0.94* | -0.17       | 0.71  | 0.98* |
| 2013 | 0.96*   | 0.93*  | 0.97*     | 0.99* | 0.99* | 0.94* | 0.13        | 0.65  | 0.99* |
| 2014 | 0.95*   | 0.87*  | 0.97*     | 0.95* | 0.99* | 0.97* | 0.09        | 0.67  | 0.97* |
| 2015 | 0.97*   | 0.82*  | 0.97*     | 0.99* | 0.99* | 0.91* | -0.23       | 0.77* | 0.99* |
| 2016 | 0.91*   | 0.90*  | 0.91*     | 0.95* | 0.98* | 0.91* | 0.06        | 0.75* | 0.97* |
| 2017 | 0.94*   | 0.84*  | 0.96*     | 0.97* | 0.99* | 0.96* | -0.21       | 0.63  | 0.99* |
| 2018 | 0.94*   | 0.90*  | 0.97*     | 0.90* | 0.99* | 0.90* | -0.41       | 0.70  | 0.95* |
| 2019 | 0.95*   | 0.88*  | 0.97*     | 0.87* | 0.99* | 0.93* | -0.60       | 0.79* | 0.95* |
| 2020 | 0.92*   | 0.87*  | 0.97*     | 0.98* | 0.98* | 0.95* | -0.28       | 0.69  | 0.96* |

\* Correlation is significant at the 0.01 level.

**Table S4. The Pearson correlation of UDI/HWN90th pair from 2003 to 2020.**

| Year | Jakarta | Boston | São Paulo | PRD   | Nile   | Tokyo | Mexico City | Paris | YRD   |
|------|---------|--------|-----------|-------|--------|-------|-------------|-------|-------|
| 2003 | 0.76*   | 0.86*  | 0.90*     | 0.94* | -0.73  | 0.95* | 0.40        | 1.00* | 0.78* |
| 2004 | 0.88*   | 0.71*  | 0.92*     | 0.78* | -0.74  | 0.96* | 0.07        | 0.90* | 0.88* |
| 2005 | 0.73*   | 0.87*  | 0.93*     | 0.88* | -0.72  | 0.97* | 0.67        | 0.96* | 0.96* |
| 2006 | 0.79*   | 0.91*  | 0.88*     | 0.75* | -0.74  | 0.98* | 0.26        | 0.94* | 0.90* |
| 2007 | 0.80*   | 0.91*  | 0.91*     | 0.89* | -0.71  | 0.98* | 0.70        | 0.80* | 0.97* |
| 2008 | 0.82*   | 0.89*  | 0.92*     | 0.81* | -0.73  | 0.87* | -0.44       | 0.91* | 0.94* |
| 2009 | 0.90*   | 0.83*  | 0.78*     | 0.78* | -0.73  | 0.98* | 0.72        | 0.94* | 0.78* |
| 2010 | 0.83*   | 0.93*  | 0.79*     | 0.59* | -0.75  | 0.98* | 0.78*       | 0.94* | 0.85* |
| 2011 | 0.88*   | 0.89*  | 0.85*     | 0.77* | -0.76  | 0.97* | 0.80*       | 0.82* | 0.62* |
| 2012 | 0.90*   | 0.90*  | 0.87*     | NA    | -0.75  | 0.97* | 0.56        | 0.91* | 0.81* |
| 2013 | 0.87*   | 0.84*  | 0.86*     | NA    | -0.76  | 0.96* | 0.67        | 0.87* | 0.99* |
| 2014 | 0.96*   | 0.76*  | 0.94*     | 0.63* | -0.77* | 0.99* | 0.48        | 0.77* | 0.72* |
| 2015 | 0.93*   | 0.87*  | 0.93*     | 0.75* | -0.49  | 0.96* | 0.54        | 0.96* | 0.98* |
| 2016 | 0.83*   | 0.85*  | 0.89*     | 0.87* | -0.18  | 0.96* | 0.44        | 0.76* | 0.95* |
| 2017 | 0.89*   | 0.82*  | 0.90*     | 0.68* | -0.27  | 0.98* | 0.55        | 0.89* | 0.99* |
| 2018 | 0.92*   | 0.90*  | 0.85*     | 0.48* | -0.39  | 0.94* | 0.17        | 0.92* | 0.81* |
| 2019 | 0.92*   | 0.81*  | 0.86*     | NA    | -0.34  | 0.92* | 0.20        | 0.89* | 0.91* |
| 2020 | 0.81*   | 0.83*  | 0.89*     | 0.55* | -0.46  | 0.96* | 0.84*       | 0.8*2 | 0.91* |

\* Correlation is significant at the 0.01 level.

**Table S5. The Pearson correlation of UDI/HWN97.5th pair from 2003 to 2020.**

| Year | Jakarta | Boston | São Paulo | PRD   | Nile   | Tokyo | Mexico City | Paris | YRD   |
|------|---------|--------|-----------|-------|--------|-------|-------------|-------|-------|
| 2003 | 0.62    | 0.71   | 0.90*     | 0.85* | -0.74* | 0.74* | -0.94       | 0.99* | 0.76* |
| 2004 | 0.80*   | 0.62   | 0.92*     | 0.69  | -0.74* | 0.82* | -0.68       | 0.88* | 0.84* |
| 2005 | 0.69    | 0.79*  | 0.93*     | 0.66  | -0.72  | 0.92* | -0.04       | 0.92* | 0.92* |
| 2006 | 0.73    | 0.83*  | 0.88*     | NA    | -0.70  | 0.95* | -0.75       | 0.93* | 0.87* |
| 2007 | 0.73    | 0.81*  | 0.91*     | 0.83* | -0.74  | 0.85* | 0.27        | 0.75* | 0.93* |
| 2008 | 0.71    | 0.78*  | 0.92*     | 0.67  | -0.73  | 0.73* | -0.62       | 0.87* | 0.91* |
| 2009 | 0.77*   | 0.69   | 0.78*     | 0.59  | -0.72  | 0.86* | -0.42       | 0.88* | 0.69* |
| 2010 | 0.78*   | 0.86*  | 0.79*     | NA    | -0.72  | 0.88* | 0.65        | 0.93* | 0.80* |
| 2011 | 0.76*   | 0.81*  | 0.85*     | 0.65  | -0.72  | 0.99* | 0.18        | 0.72* | -0.20 |
| 2012 | 0.75*   | 0.83*  | 0.87*     | NA    | -0.73  | 0.95* | -0.06       | 0.88* | 0.77* |
| 2013 | 0.71    | 0.75*  | 0.86*     | NA    | -0.77* | 0.89* | -0.14       | 0.81* | 0.98* |
| 2014 | 0.84*   | 0.63   | 0.94*     | NA    | -0.72  | 0.98* | -0.40       | 0.69* | 0.67* |
| 2015 | 0.78*   | 0.76*  | 0.93*     | 0.64  | -0.66  | 0.97* | -0.37       | 0.91* | 0.92* |
| 2016 | 0.57    | 0.74   | 0.89*     | 0.71  | -0.36  | 0.91* | 0.53        | 0.69* | 0.87* |
| 2017 | 0.66    | 0.69   | 0.90*     | 0.69  | -0.53  | 0.95* | 0.11        | 0.95* | 0.94* |
| 2018 | 0.76*   | 0.79*  | 0.85*     | 0.46  | -0.47  | 0.89* | -0.41       | 0.81* | 0.67* |
| 2019 | 0.72    | 0.67   | 0.86*     | NA    | -0.56  | 0.81* | -0.86*      | 0.83* | 0.87* |
| 2020 | 0.60    | 0.73*  | 0.89*     | -0.63 | -0.53  | 0.85* | -0.03       | 0.78* | 0.84* |

\* Correlation is significant at the 0.01 level.

**Table S6. The percolation results of UHI hotspot in three time periods.**

|                    | Time Period | X1    | Y1   | X2    | Y2   | Area(m <sup>2</sup> ) |
|--------------------|-------------|-------|------|-------|------|-----------------------|
| <b>Boston</b>      | 2003-2008   | 24.00 | 0.96 | 32.00 | 0.04 | 165639.00             |
|                    | 2009-2014   | 23.00 | 0.98 | 29.00 | 0.11 | 167626.00             |
|                    | 2015-2020   | 25.00 | 0.98 | 32.00 | 0.04 | 167332.00             |
| <b>São Paulo</b>   | 2003-2008   | 26.00 | 0.92 | 35.00 | 0.03 | 124579.00             |
|                    | 2009-2014   | 28.00 | 0.91 | 36.00 | 0.10 | 122001.00             |
|                    | 2015-2020   | 26.00 | 0.92 | 35.00 | 0.02 | 123493.00             |
| <b>Jakarta</b>     | 2003-2008   | 26.00 | 0.82 | 37.00 | 0.01 | 124576.00             |
|                    | 2009-2014   | 25.00 | 0.84 | 35.00 | 0.01 | 126872.00             |
|                    | 2015-2020   | 24.00 | 0.86 | 34.00 | 0.02 | 130015.00             |
| <b>Tokyo</b>       | 2003-2008   | 21.00 | 0.88 | 29.00 | 0.05 | 133909.00             |
|                    | 2009-2014   | 21.00 | 0.89 | 29.00 | 0.07 | 136091.00             |
|                    | 2015-2020   | 21.00 | 0.87 | 29.00 | 0.07 | 135481.00             |
| <b>Mexico City</b> | 2003-2008   | 23.00 | 0.94 | 36.00 | 0.08 | 408070.00             |
|                    | 2009-2014   | 23.00 | 0.92 | 37.00 | 0.02 | 401334.00             |
|                    | 2015-2020   | 24.00 | 0.94 | 40.00 | 0.04 | 408022.00             |
| <b>Nile</b>        | 2003-2008   | 33.00 | 0.96 | 52.00 | 0.94 | 69655.60              |
|                    | 2009-2014   | 33.00 | 0.96 | 51.00 | 0.01 | 69291.30              |
|                    | 2015-2020   | 34.00 | 0.94 | 51.00 | 0.02 | 68143.50              |
| <b>Paris</b>       | 2003-2008   | 23.00 | 0.92 | 28.00 | 0.09 | 60765.40              |
|                    | 2009-2014   | 22.00 | 0.97 | 26.00 | 0.13 | 63398.00              |
|                    | 2015-2020   | 29.00 | 0.90 | 36.00 | 0.05 | 58603.30              |
| <b>PRD</b>         | 2003-2008   | 28.00 | 0.98 | 36.00 | 0.08 | 50036.60              |
|                    | 2009-2014   | 28.00 | 0.95 | 36.00 | 0.08 | 48782.70              |
|                    | 2015-2020   | 28.00 | 0.96 | 39.00 | 0.04 | 49124.80              |
| <b>YRD</b>         | 2003-2008   | 28.00 | 0.98 | 33.00 | 0.05 | 269563.00             |
|                    | 2009-2014   | 28.00 | 0.97 | 34.00 | 0.05 | 271325.00             |

|           |       |      |       |      |           |
|-----------|-------|------|-------|------|-----------|
| 2015-2020 | 28.00 | 0.97 | 34.00 | 0.06 | 270811.00 |
|-----------|-------|------|-------|------|-----------|

X1、X2、Y1、Y2 correspond to the X、Y values of thresholds in Percolation model.

**Table S7. The percolation results of CHT hotspot in three time periods.**

|                    | Time Period | X1    | Y1   | X2     | Y2   | Area(m <sup>2</sup> ) |
|--------------------|-------------|-------|------|--------|------|-----------------------|
| <b>Boston</b>      | 2003-2008   | 3.04  | 0.23 | 50.43  | 0.00 | 78850.70              |
|                    | 2009-2014   | 3.04  | 0.02 | 18.70  | 0.00 | 15704.90              |
|                    | 2015-2020   | 3.04  | 0.30 | 78.04  | 0.00 | 76534.10              |
| <b>São Paulo</b>   | 2003-2008   | 3.74  | 0.24 | 42.86  | 0.02 | 48106.90              |
|                    | 2009-2014   | 1.98  | 0.64 | 65.93  | 0.02 | 89845.80              |
|                    | 2015-2020   | 3.96  | 0.50 | 52.97  | 0.03 | 73905.10              |
| <b>Jakarta</b>     | 2003-2008   | 3.04  | 0.21 | 23.91  | 0.03 | 52694.50              |
|                    | 2009-2014   | 3.91  | 0.19 | 43.04  | 0.02 | 47528.60              |
|                    | 2015-2020   | 5.65  | 0.13 | 51.74  | 0.02 | 34249.50              |
| <b>Tokyo</b>       | 2003-2008   | 14.01 | 0.03 | 89.87  | 0.00 | 29659.10              |
|                    | 2009-2014   | 4.74  | 0.05 | 89.87  | 0.00 | 46372.10              |
|                    | 2015-2020   | 5.82  | 0.07 | 80.82  | 0.01 | 42942.80              |
| <b>Mexico City</b> | 2003-2008   | 5.00  | 0.07 | 81.09  | 0.01 | 85478.00              |
|                    | 2009-2014   | 4.57  | 0.10 | 81.52  | 0.00 | 77611.50              |
|                    | 2015-2020   | 4.13  | 0.13 | 88.04  | 0.00 | 122591.00             |
| <b>Nile</b>        | 2003-2008   | 38.90 | 0.86 | 100.00 | 0.02 | 62273.10              |
|                    | 2009-2014   | 44.18 | 0.87 | 98.02  | 0.02 | 62433.30              |
|                    | 2015-2020   | 45.93 | 0.86 | 98.02  | 0.02 | 62048.50              |
| <b>Paris</b>       | 2003-2008   | 5.95  | 0.00 | 6.82   | 0.00 | 31.85                 |
|                    | 2009-2014   | 5.00  | 0.00 | 6.04   | 0.00 | 154.24                |
|                    | 2015-2020   | 2.92  | 0.06 | 23.97  | 0.00 | 7352.77               |
| <b>PRD</b>         | 2003-2008   | 9.38  | 0.39 | 84.01  | 0.04 | 24497.80              |
|                    | 2009-2014   | 24.95 | 0.09 | 76.97  | 0.04 | 12648.60              |
|                    | 2015-2020   | 11.09 | 0.42 | 81.02  | 0.16 | 26323.40              |
| <b>YRD</b>         | 2003-2008   | 7.25  | 0.28 | 75.91  | 0.01 | 119707.00             |
|                    | 2009-2014   | 9.59  | 0.42 | 76.12  | 0.01 | 144619.00             |
|                    | 2015-2020   | 11.94 | 0.22 | 84.86  | 0.02 | 104568.00             |

X1、X2、Y1、Y2 correspond to the X、Y values of thresholds in Percolation model.

**Table S8. The percolation results of HWN90th hotspot in three time periods.**

|                    | Time Period | X1   | Y1   | X2    | Y2   | Area(m <sup>2</sup> ) |
|--------------------|-------------|------|------|-------|------|-----------------------|
| <b>Boston</b>      | 2003-2008   | 1.93 | 0.60 | 32.20 | 0.01 | 146960.00             |
|                    | 2009-2014   | 1.90 | 0.49 | 22.72 | 0.01 | 119661.00             |
|                    | 2015-2020   | 1.88 | 0.74 | 22.70 | 0.00 | 147606.00             |
| <b>São Paulo</b>   | 2003-2008   | 2.00 | 0.67 | 21.41 | 0.00 | 94646.90              |
|                    | 2009-2014   | 0.94 | 0.83 | 32.94 | 0.01 | 113624.00             |
|                    | 2015-2020   | 2.00 | 0.78 | 26.94 | 0.00 | 106972.00             |
| <b>Jakarta</b>     | 2003-2008   | 2.03 | 0.23 | 20.93 | 0.01 | 63890.10              |
|                    | 2009-2014   | 2.03 | 0.20 | 19.02 | 0.00 | 49532.60              |
|                    | 2015-2020   | 3.11 | 0.04 | 9.93  | 0.01 | 27751.40              |
| <b>Tokyo</b>       | 2003-2008   | 2.93 | 0.09 | 17.95 | 0.00 | 31268.20              |
|                    | 2009-2014   | 3.02 | 0.18 | 23.71 | 0.00 | 37715.30              |
|                    | 2015-2020   | 4.00 | 0.08 | 17.95 | 0.00 | 38071.70              |
| <b>Mexico City</b> | 2003-2008   | 2.00 | 0.51 | 31.93 | 0.01 | 263113.00             |
|                    | 2009-2014   | 2.00 | 0.40 | 31.93 | 0.01 | 245147.00             |

|              |           |      |      |       |      |           |
|--------------|-----------|------|------|-------|------|-----------|
|              | 2015-2020 | 2.00 | 0.64 | 31.93 | 0.00 | 289830.00 |
| <b>Nile</b>  | 2003-2008 | 0.88 | 0.82 | 52.97 | 0.16 | 61037.30  |
|              | 2009-2014 | 0.88 | 0.78 | 49.89 | 0.15 | 58067.00  |
|              | 2015-2020 | 0.88 | 0.82 | 41.10 | 0.16 | 59515.40  |
| <b>Paris</b> | 2003-2008 | 3.55 | 0.04 | 13.13 | 0.04 | 2974.46   |
|              | 2009-2014 | 2.93 | 0.05 | 13.04 | 0.04 | 1478.22   |
|              | 2015-2020 | 1.95 | 0.74 | 25.99 | 0.05 | 52299.60  |
| <b>PRD</b>   | 2003-2008 | 3.99 | 0.03 | 21.82 | 0.00 | 10265.20  |
|              | 2009-2014 | 8.87 | 0.00 | 16.94 | 0.00 | 805.86    |
|              | 2015-2020 | 3.99 | 0.00 | 14.99 | 0.00 | 390.11    |
| <b>YRD</b>   | 2003-2008 | 3.94 | 0.08 | 11.94 | 0.00 | 57841.00  |
|              | 2009-2014 | 6.93 | 0.02 | 13.01 | 0.00 | 40427.30  |
|              | 2015-2020 | 5.97 | 0.08 | 14.93 | 0.00 | 61261.50  |

X1、X2, Y1, Y2 correspond to the X, Y values of thresholds in Percolation model.

**Table S9. The percolation results of HWN97.5th hotspot in three time periods.**

|                    | Time Period | X1   | Y1   | X2    | Y2   | Area(m <sup>2</sup> ) |
|--------------------|-------------|------|------|-------|------|-----------------------|
| <b>Boston</b>      | 2003-2008   | 1.94 | 0.52 | 31.43 | 0.00 | 115588.00             |
|                    | 2009-2014   | 1.94 | 0.13 | 18.88 | 0.00 | 67895.40              |
|                    | 2015-2020   | 1.94 | 0.46 | 13.88 | 0.01 | 107802.00             |
| <b>São Paulo</b>   | 2003-2008   | 1.89 | 0.26 | 13.00 | 0.01 | 71965.70              |
|                    | 2009-2014   | 0.89 | 0.67 | 21.22 | 0.02 | 89011.30              |
|                    | 2015-2020   | 1.89 | 0.57 | 15.11 | 0.01 | 81537.20              |
| <b>Jakarta</b>     | 2003-2008   | 2.07 | 0.13 | 12.17 | 0.00 | 33101.00              |
|                    | 2009-2014   | 1.96 | 0.10 | 13.37 | 0.00 | 23282.80              |
|                    | 2015-2020   | 4.13 | 0.01 | 8.15  | 0.00 | 5657.17               |
| <b>Tokyo</b>       | 2003-2008   | 3.02 | 0.05 | 20.29 | 0.00 | 14901.80              |
|                    | 2009-2014   | 2.93 | 0.10 | 21.07 | 0.00 | 20782.30              |
|                    | 2015-2020   | 4.78 | 0.04 | 16.98 | 0.00 | 16282.00              |
| <b>Mexico City</b> | 2003-2008   | 2.00 | 0.41 | 27.88 | 0.00 | 202689.00             |
|                    | 2009-2014   | 2.00 | 0.25 | 23.06 | 0.00 | 150448.00             |
|                    | 2015-2020   | 2.00 | 0.50 | 27.88 | 0.00 | 234755.00             |
| <b>Nile</b>        | 2003-2008   | 0.88 | 0.68 | 29.23 | 0.13 | 50176.90              |
|                    | 2009-2014   | 0.88 | 0.57 | 38.90 | 0.12 | 43044.40              |
|                    | 2015-2020   | 0.88 | 0.56 | 38.90 | 0.12 | 41751.30              |
| <b>Paris</b>       | 2003-2008   | 1.98 | 0.00 | 3.71  | 0.00 | 115.39                |
|                    | 2009-2014   | 1.98 | 0.00 | 3.71  | 0.00 | 307.92                |
|                    | 2015-2020   | 1.98 | 0.37 | 21.97 | 0.00 | 33126.10              |
| <b>PRD</b>         | 2003-2008   | 3.96 | 0.01 | 22.07 | 0.00 | 2769.73               |
|                    | 2009-2014   | 6.99 | 0.00 | 16.00 | 0.00 | 276.38                |
|                    | 2015-2020   | 3.96 | 0.00 | 11.84 | 0.00 | 91.55                 |
| <b>YRD</b>         | 2003-2008   | 3.84 | 0.05 | 13.01 | 0.00 | 32214.80              |
|                    | 2009-2014   | 7.89 | 0.01 | 13.01 | 0.00 | 12818.90              |
|                    | 2015-2020   | 6.72 | 0.05 | 21.00 | 0.00 | 37983.30              |

X1、X2, Y1, Y2 correspond to the X, Y values of thresholds in Percolation model.

**Table S10. The correlation between UHI, UHW indicator and global mean temperature.**

|                     | Summer Daytime | Summer Night-time | CHT    | HWN90th | HWN97.5th |
|---------------------|----------------|-------------------|--------|---------|-----------|
| <b>BostonB</b>      | 0.61*          | 0.51*             | 0.41*  | 0.54*   | 0.49*     |
| <b>BostonN</b>      | 0.52*          | 0.52*             | 0.28*  | 0.47*   | 0.32*     |
| <b>YRDB</b>         | 0.57*          | 0.49*             | -0.61* | 0.14*   | 0.18*     |
| <b>YRDN</b>         | 0.12*          | 0.46*             | -0.61* | 0.24*   | 0.16*     |
| <b>TokyoB</b>       | 0.46*          | 0.39*             | 0.47*  | 0.32*   | 0.37*     |
| <b>TokyoN</b>       | 0.21*          | 0.35*             | 0.28*  | 0.37*   | 0.41*     |
| <b>ParisB</b>       | 0.24*          | 0.25*             | 0.42*  | 0.07*   | 0.07*     |
| <b>ParisN</b>       | 0.26*          | 0.20*             | 0.55*  | 0.13*   | 0.13*     |
| <b>PRDB</b>         | 0.52*          | 0.44*             | 0.46*  | -0.37*  | -0.35*    |
| <b>PRDN</b>         | -0.59*         | 0.41*             | 0.40*  | -0.27*  | -0.33*    |
| <b>NileB</b>        | -0.07*         | 0.74*             | 0.62*  | -0.26*  | -0.38*    |
| <b>NileN</b>        | -0.40*         | 0.76*             | 0.05*  | -0.51*  | -0.60*    |
| <b>JakartaB</b>     | 0.14*          | 0.70*             | 0.24*  | -0.18*  | -0.09*    |
| <b>JakartaN</b>     | -0.23*         | 0.61*             | -0.04* | -0.19*  | -0.16*    |
| <b>Mexico CityB</b> | 0.21*          | 0.60*             | -0.28* | 0.14*   | 0.16*     |
| <b>Mexico CityN</b> | 0.18*          | 0.35*             | -0.22* | 0.13*   | 0.15*     |
| <b>São PauloB</b>   | 0.46*          | 0.53*             | 0.15*  | -0.13*  | -0.07*    |
| <b>São PauloN</b>   | 0.32*          | 0.49*             | -0.02* | 0.01*   | 0.05*     |

\* Correlation is significant at the 0.01 level.

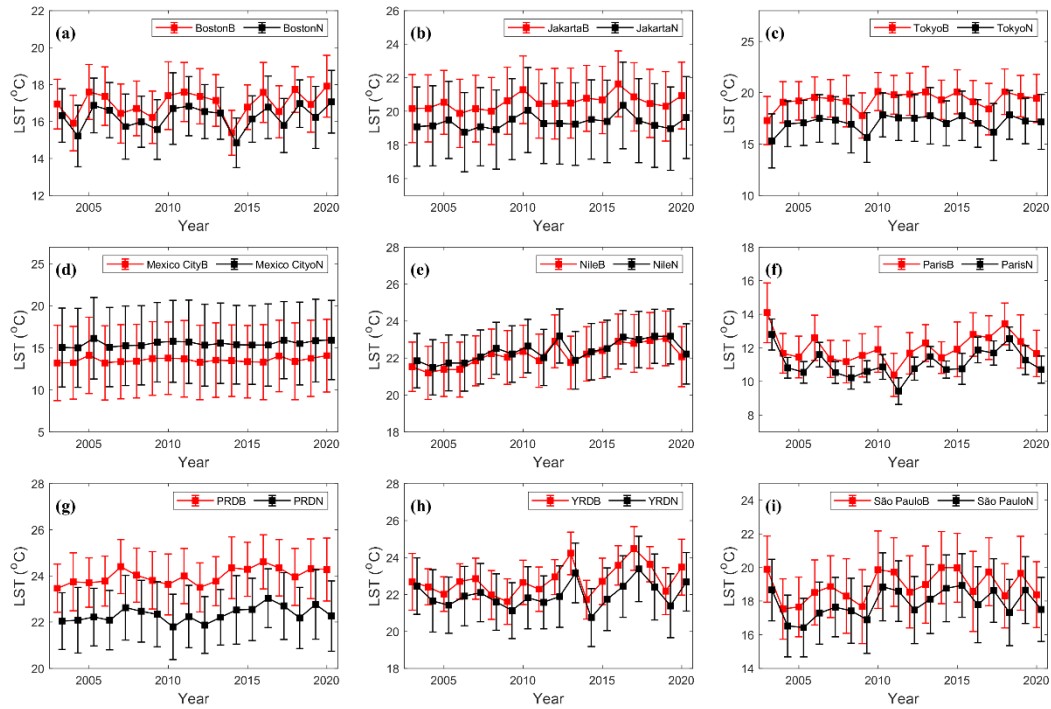

**Figure S1.** Time series of mean LST in the summer nighttime from 2003 to 2020 in the 9 megaregions in the built-up and non-built-up areas. Error bars are graphical representations of the standard deviation of mean LST in the mega-region (B = Built-up area, N = Non-built-up area).

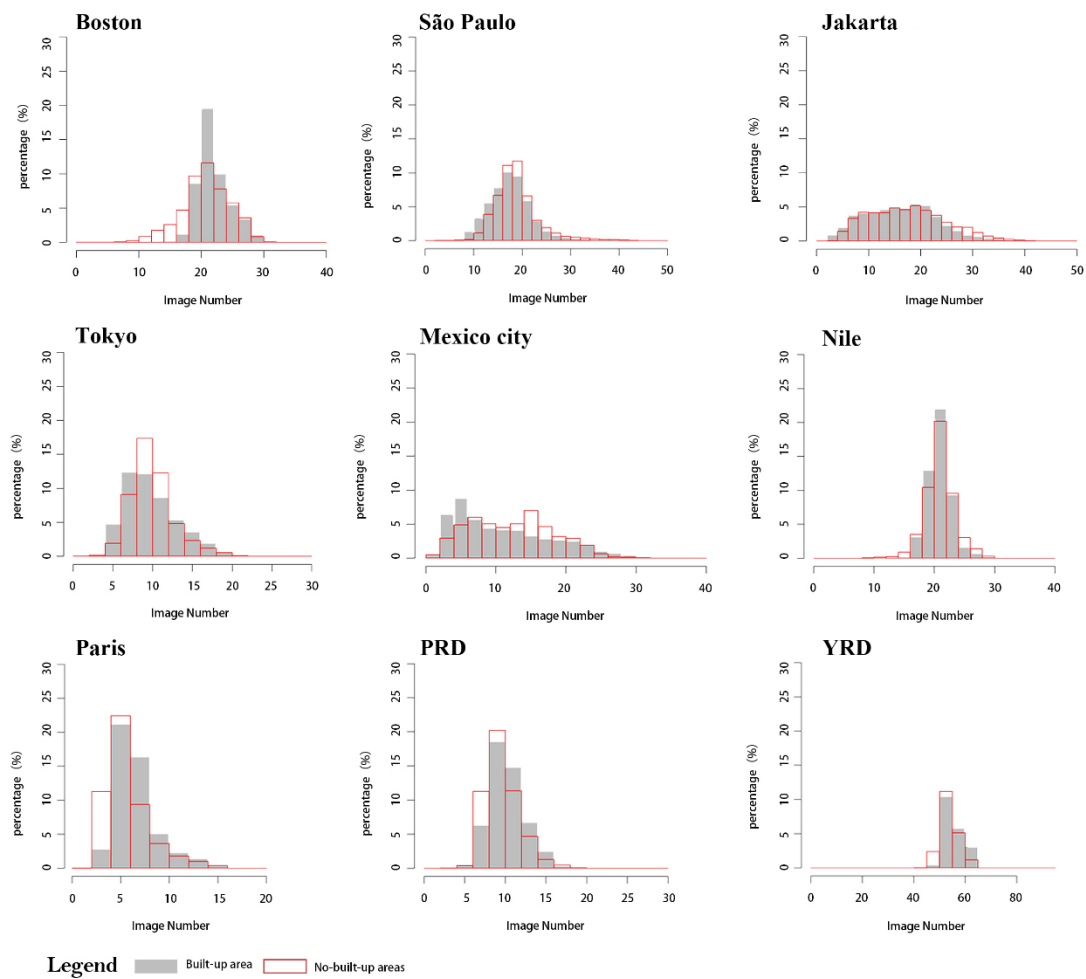

**Figure S2: Histogram of mean MODIS LST data available at summer time in the built-up and non-built-up areas**
